# Supplementary material
Source: bioRxiv or medRxiv preprint supplement (https://www.medrxiv.org/highwire/filestream/84147/field_highwire_adjunct_files/0/2020.05.30.20117770-1.pdf)

# COVID-19 apparent reproductive number dropped during Spain's nationwide dropdown, then spiked at lower-incidence regions, Santamaría & Hortal

## Supplementary Materials

Figure S1: Goodness of fit of segmented regression models. RSS: residual sum of squares. BIC: bayesian information criterion.

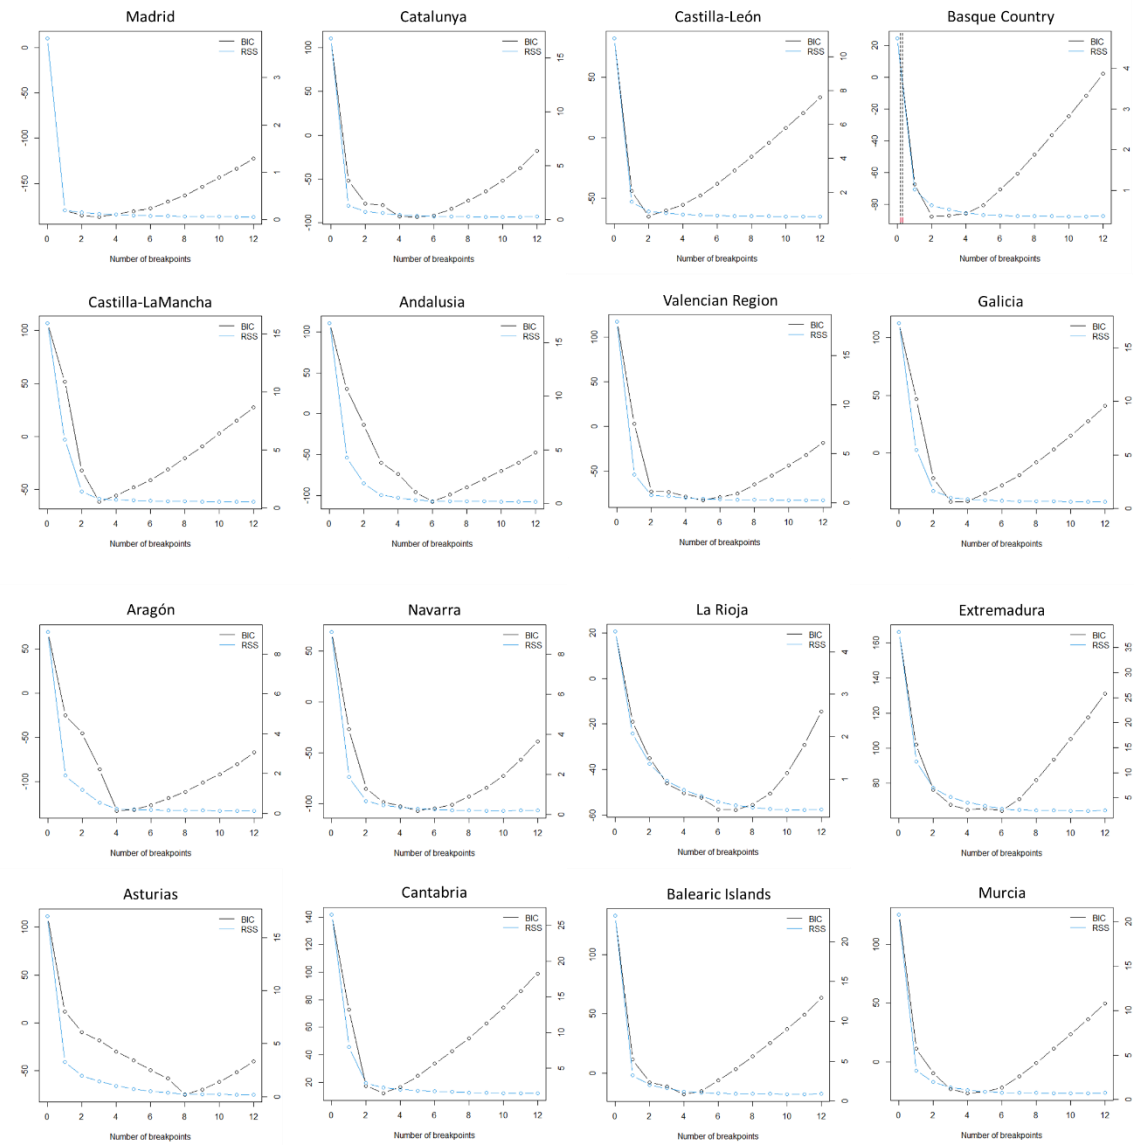

Supplement: Supplementary file [file 2020.05.30.20117770-1.pdf]
